# Supplementary material for: Prognostic Value of RDW and Its Contribution to Scoring Systems in Patients with Chronic Obstructive Pulmonary Disease
Source: Research Square preprint supplement (doi:10.21203/rs.3.rs-6549201/v1), 2025-05-29
Supplement: Supplementary file 1 [file 51ebf8c53ebc8a30c2dda437.docx]

**Supplementary Table S1. Comparison of Clinical and Laboratory Characteristics by 10-Year Survival Status in the Derivation Cohort**

| **Variable** | **Alive (n=59)** | **Deceased (n=77)** | **P-value** |
| --- | --- | --- | --- |
| **Demographics** |  |  |  |
| Age (years) | 61.0 ± 7.4 | 69.4 ± 8.3 | <0.001 * |
| Male, n (%) | 47 (79.7%) | 64 (83.1%) | 0.606 |
| BMI | 28.6 ± 4.6 | 28.3 ± 5.6 | 0.781 |
| BMI ≤21, n (%) | 2 (3.4%) | 7 (9.1%) | 0.185 |
| Smoking status (Never/Former/Current), n (%) | See notes | See notes | 0.685 |
| Pack years | 31.0 ± 28.3 | 41.3 ± 39.0 | 0.078 |
| **Comorbidities** |  |  |  |
| Hypertension, n (%) | 19 (32.2%) | 38 (49.4%) | 0.045 * |
| Diabetes mellitus, n (%) | 9 (15.3%) | 18 (23.4%) | 0.239 |
| Coronary artery disease, n (%) | 11 (18.6%) | 20 (26.0%) | 0.313 |
| Congestive heart failure, n (%) | 3 (5.1%) | 11 (14.3%) | 0.080 |
| **Pulmonary Function Tests** |  |  |  |
| FEV1/FVC ratio | 60.1 ± 8.0 | 55.2 ± 10.7 | 0.011 * |
| FEV1 (L) | 1.64 ± 0.52 | 1.17 ± 0.48 | <0.001 * |
| FEV1 (% predicted) | 58.4 ± 15.7 | 46.5 ± 17.6 | <0.001 * |
| FVC (L) | 2.67 ± 0.80 | 2.10 ± 0.73 | <0.001 * |
| FVC (% predicted) | 76.3 ± 17.7 | 64.4 ± 18.7 | <0.001 * |
| **Symptoms and Exacerbations** |  |  |  |
| MMRC dyspnea scale, n (%) | See notes | See notes | <0.001 * |
| Annual exacerbations | 1.20 ± 2.18 | 2.66 ± 3.30 | 0.002 * |
| Annual hospitalizations | 0.39 ± 0.79 | 0.96 ± 1.50 | 0.029 * |
| **Laboratory Parameters** |  |  |  |
| CRP (mg/L) | 6.86 ± 5.67 | 7.29 ± 5.71 | 0.332 |
| WBC (10³/µL) | 8.73 ± 1.89 | 8.45 ± 2.23 | 0.350 |
| Lymphocyte count (10³/µL) | 2.30 ± 0.76 | 2.00 ± 0.64 | 0.011 * |
| Eosinophil count (10³/µL) | 0.26 ± 0.31 | 0.20 ± 0.14 | 0.991 |
| Hemoglobin (g/dL) | 15.3 ± 1.6 | 14.7 ± 2.4 | 0.117 |
| RDW (%) | 12.3 ± 1.2 | 13.6 ± 1.7 | <0.001 * |
| NLR | 2.92 ± 2.97 | 2.99 ± 1.25 | 0.025 * |
| MLR | 0.30 ± 0.17 | 0.35 ± 0.15 | 0.045 * |
| PLR | 112.8 ± 40.4 | 138.5 ± 65.6 | 0.018 * |

***Notes:*** *Data are presented as mean ± standard deviation or number (percentage). Statistically significant values are indicated with an asterisk (p < 0.05).*

***Smoking status distribution:***

*Alive group: Never: 13 (22.0%), Former: 30 (50.9%), Current: 16 (27.1%)*

*Deceased group: Never: 19 (24.7%), Former: 42 (54.5%), Current: 16 (20.8%)*

***MMRC dyspnea scale distribution:***

*Alive group: 0: 7 (11.9%), 1: 31 (52.5%), 2: 10 (17.0%), 3: 9 (15.3%), 4: 2 (3.4%)*

*Deceased group: 0: 3 (3.9%), 1: 21 (27.3%), 2: 18 (23.4%), 3: 14 (18.2%), 4: 21 (27.3%)*


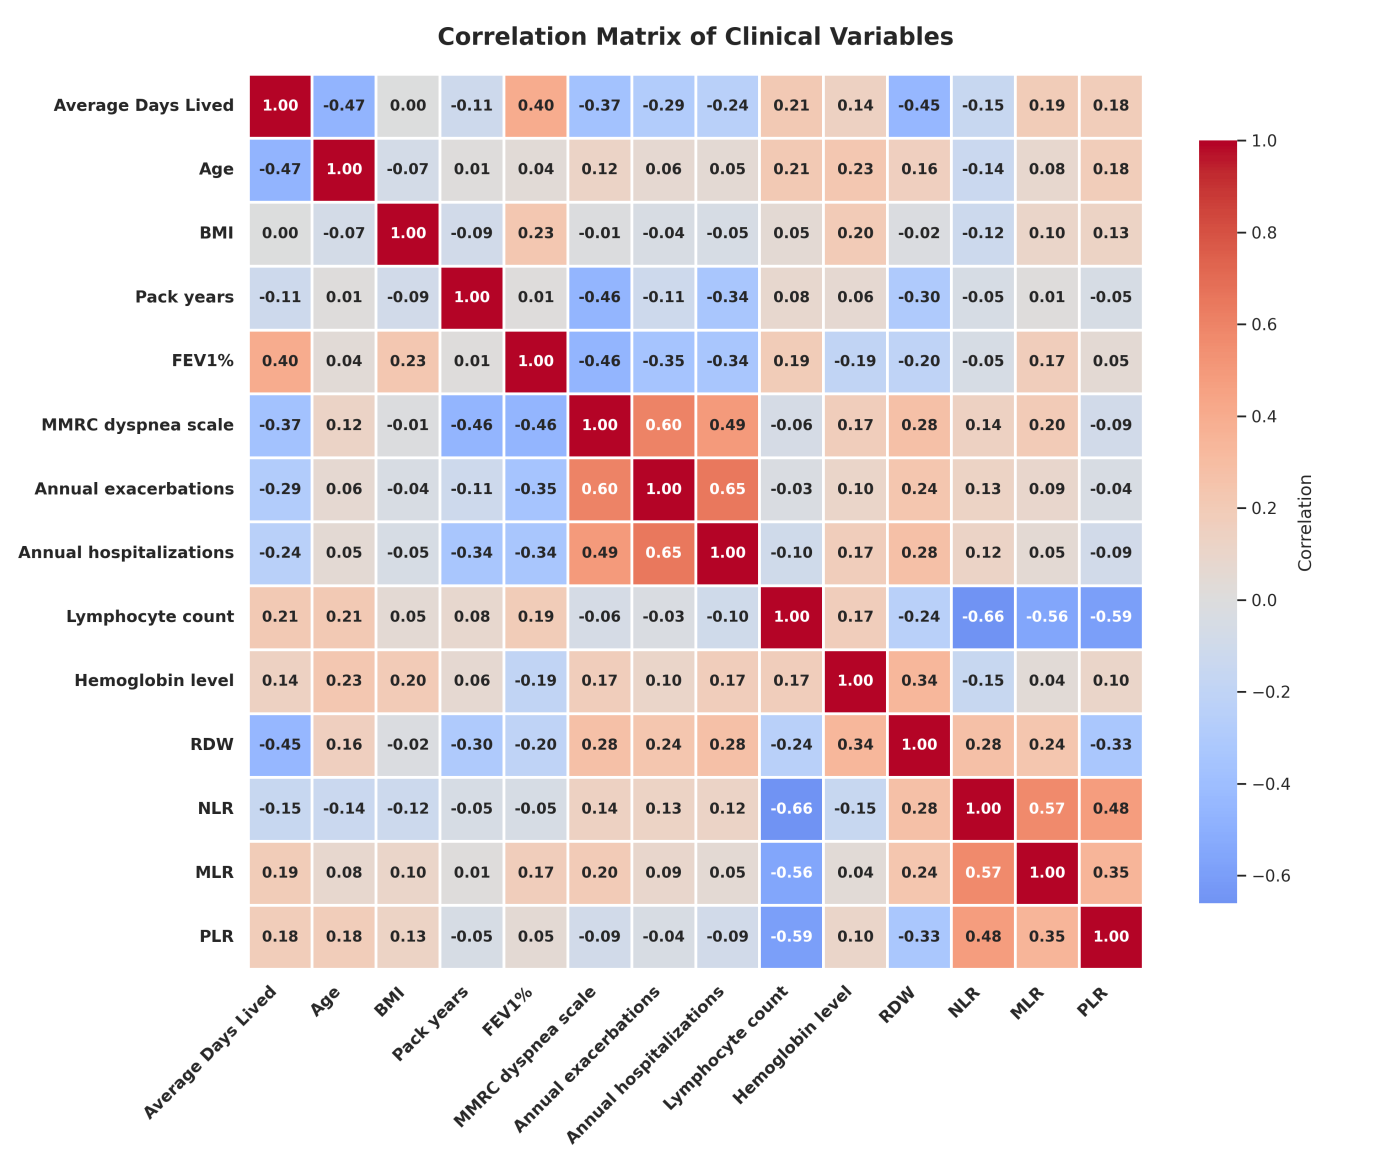


**Supplementary Figure S1. Correlation matrix of clinical variables in the Derivation Cohort**

The figure illustrates the relationships between “Average Days Lived” and various clinical parameters. Positive and negative correlations are shown in red and blue tones, respectively. Correlation coefficients are based on Pearson correlation analysis.

**Supplementary Table S2. Performance Metrics of the 4-Variable and 7-Variable Prognostic Models**

| Dataset | C-index | IBS | AIC | C-index | IBS | AIC | LLR  p- value |
| --- | --- | --- | --- | --- | --- | --- | --- |
|  | 4-Variable Model |  |  | 7-Variable Model |  |  |  |
| Derivation | 0.798 | 0.115 | 634.4 | 0.802 | 0.114 | 626.9 | 0.004 |
| Cross Validation | 0.785 ± 0.017 | 0.076 ± 0.037 | 479.9 ± 10.7 | 0.8 ±  0.028 | 0.077 ± 0.038 | 475.5 ±  9.6 | 0.053 ± 0.08 |
| Validation | 0.744  ± 0.01 | 0.075  ± 0.03 | 1003.5  ± 1.4 | 0.745  ± 0.01 | 0.076  ± 0.04 | 1008.3  ± 1.5 | 0.668  ± 0.1 |

**Notes:** C-index: Harrell’s concordance index. IBS: Integrated Brier Score. AIC: Akaike Information Criterion. LLR: Likelihood ratio test comparing the 7-variable model with the 4-variable model.

| 1. ADO Score   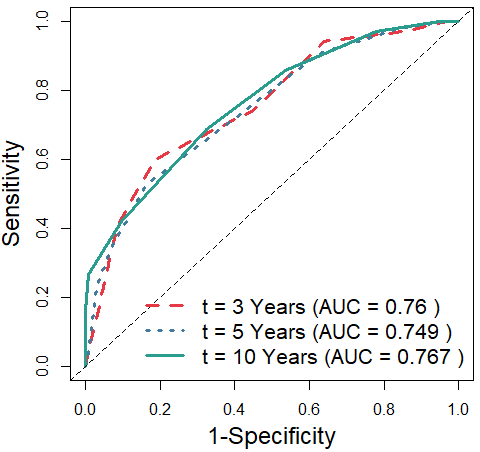 | 1. ADO + RDW Score   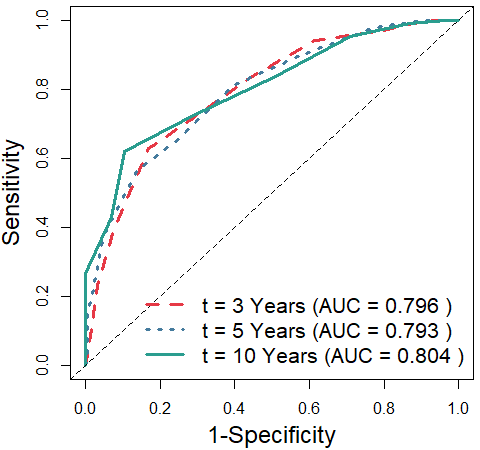 |
| --- | --- |
| 1. DOSE Score   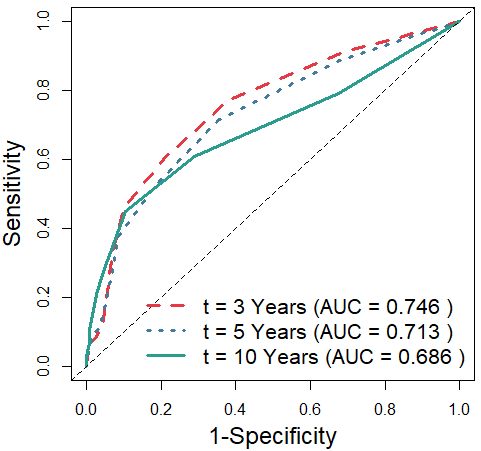 | 1. DOSE + RDW Score   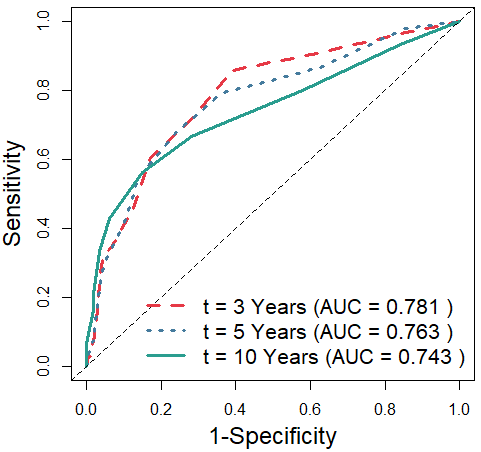 |
| 1. BODEX Score   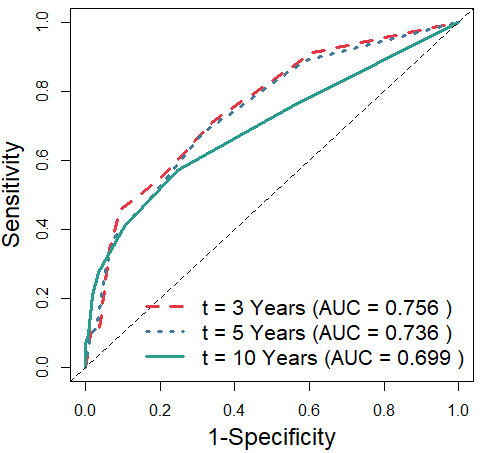 | 1. BODEX + RDW Score   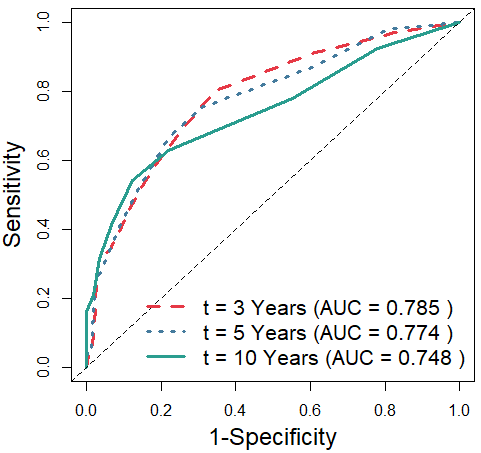 |

***Supplementary Figure S2. Time-Dependent ROC Curves: The Effect of Adding RDW on the Prognostic Performance of Existing Scoring Systems (ADO, DOSE, BODEx) in Predicting 3-, 5-, and 10-Year Mortality (Validation Cohort)*** *The left panels display the time-dependent ROC curves of the original ADO, DOSE, and BODEx scores for predicting 3-, 5-, and 10-year mortality, while the right panels illustrate the performance of the same scores with RDW added.*

**Supplementary Table and Figure S3. Comparison of ADO, DOSE, and BODEX scores with and without RDW Using C-index, Brier Score, LLR p-value, and Calibration Plots in the Derivation Dataset**

|  | Without RDW | | With RDW | |  |
| --- | --- | --- | --- | --- | --- |
| Scoring System | C-index | IBS | C-index | IBS | LLR p-value |
| ADO | 0.797 | 0.0781 | 0.823 | 0.0704 | < 0.001 |
| DOSE | 0.690 | 0.0837 | 0.741 | 0.0766 | < 0.001 |
| BODEX | 0.707 | 0.0802 | 0.750 | 0.0741 | < 0.001 |

**Notes:** Table S3 summarizes model performance metrics for 10-year mortality prediction, while Figure S3 illustrates the calibration of predicted versus observed mortality. Green, blue, and red lines correspond to 3-year, 5-year, and 10-year mortality, respectively.

**Supplementary Table and Figure S4. Comparison of ADO, DOSE, and BODEX Scores With and Without RDW Using C-index, Brier Score, LLR p-value, and Calibration Plots in the Cross-Validation Dataset**

|  | Without RDW | | With RDW | |  |
| --- | --- | --- | --- | --- | --- |
| Scoring System | C-index | IBS | C-index | IBS | LLR p-value |
| ADO | 0.803 ± 0.018 | 0.078 ± 0.039 | 0.837 ± 0.022 | 0.070 ± 0.034 | < 0.001 |
| DOSE | 0.692 ± 0.077 | 0.084 ± 0.043 | 0.743 ± 0.047 | 0.077 ± 0.038 | < 0.001 |
| BODEX | 0.707 ± 0.094 | 0.080 ± 0.041 | 0.756 ± 0.082 | 0.074 ± 0.037 | < 0.001 |

**Notes:** *Table S4 summarizes model performance metrics for 10-year mortality prediction, while Figure S4 illustrates the calibration of predicted versus observed mortality. Green, blue, and red lines correspond to 3-year, 5-year, and 10-year mortality, respectively.*

**Supplementary Table and Figure S5. Comparison of ADO, DOSE, and BODEX Scores With and Without RDW Using C-index, Brier Score, LLR p-value, and Calibration Plots in the Validation Dataset**

|  | Without RDW | | With RDW | |  |
| --- | --- | --- | --- | --- | --- |
| Scoring System | C-index | IBS | C-index | IBS | LLR p-value |
| ADO | 0.736 ± 0.0023 | 0.0807 ± 0.0414 | 0.759 ± 0.0011 | 0.0762 ± 0.0382 | < 0.001 |
| DOSE | 0.678 ± 0.0036 | 0.0845 ± 0.0443 | 0.714 ± 0.0012 | 0.0804 ± 0.0414 | < 0.001 |
| BODEX | 0.688 ± 0.0040 | 0.0838 ± 0.0438 | 0.715 ± 0.0022 | 0.0800 ± 0.0411 | < 0.001 |

***Notes:*** *Table S5 summarizes model performance metrics for 10-year mortality prediction, while Figure S5 illustrates the calibration of predicted versus observed mortality. Green, blue, and red lines correspond to 3-year, 5-year, and 10-year mortality, respectively.*

**Supplementary Table S6. Comparison of RDW Levels According to Clinical Characteristics in the Derivation and Validation Cohorts**

|  | **Derivation Cohort**  **n=136** | | | **Validation Cohort**  **n=219** | | |
| --- | --- | --- | --- | --- | --- | --- |
| ***Variables*** | ***RDW Level (Mean ± SD)***  ***Yes*** | ***RDW Level (Mean ± SD)***  ***No*** | ***p-value*** | ***RDW Level (Mean ± SD)***  ***Yes*** | ***RDW Level (Mean ± SD)***  ***No*** | ***p-value*** |
| *Dead after 10 years* | 13.6 ± 1.7 (n=77) | 12.3 ± 1.2 (n=59) | <0.001 * | 13.6 ± 1.9 (n=106) | 12.4 ± 1.3 (n=113) | <0.001 * |
| *Male sex* | 13 ±1.7 (n=111) | 13.2 ±1,3 (n=25) | 0.19 | 12,8 ±1.5 (n=176) | 13.9 ±2.3 (n=43) | 0,003 * |
| *BMI <21* | 14.1 ± 1.8 (n=9) | 13 ± 1.6 (n=127) | 0.043 * | 14.9 ± 2 (n=10) | 12,9 ± 1.7 (n=209) | 0,002 * |
| *Active smoking* | 12.9 ± 1.6 (n=32) | 13,1 ± 1.6 (n=104) | 0.613 | 13 ± 1.7 (n=49) | 13 ± 1.8 (n=170) | 0.492 |
| *Hypertension* | 13.1 ± 1.5 (n=57) | 13 ± 1.7 (n=79) | 0.357 | 13 ± 1.6 (n=108) | 13 ± 1.9 (n=111) | 0.94 |
| *Diabetes mellitus* | 12.7±1.5 (n=27) | 13.1 ± 1.7 (n=109) | 0.194 | 13±1.8 (n=47) | 13 ± 1.7 (n=172) | 0.722 |
| *Coronary artery disease* | 14.1 ± 2.1 (n=31) | 12.7 ± 1.3 (n=105) | <0.001 * | 13,5 ± 2 (n=50) | 12.9± 1.7 (n=169) | 0.043 * |
| *Congestive heart failure* | 14 ± 1.9 (n=14) | 12.9 ±1.6 (n=122) | 0.035 * | 13.4 ± 1.9 (n=28) | 12.9 ±1.7 (n=191) | 0.127 |

***Notes:*** *This table shows mean RDW values (± standard deviation) across different clinical subgroups within the derivation (n=136) and validation (n=219) cohorts. Statistically significant values are indicated with an asterisk (p < 0.05).*

**Supplementary Table S7. Correlation of RDW with Clinical, Laboratory, and Scoring Parameters in the Derivation and Validation Cohorts**

|  | **Derivation Cohort**  **n=136** | | **Validation Cohort**  **n=219** | |
| --- | --- | --- | --- | --- |
| **Variables** | **Correlation coefficient** | **p-value** | **Correlation coefficient** | **p-value** |
| Average Days Lived | -0.453 | <0.001 * | -0.401 | <0.001 * |
| Age | 0.161 | 0.061 | 0.204 | 0,02 * |
| FEV1 (% predicted) | -0.295 | <0.001 * | -0.305 | <0.001 * |
| MMRC dyspnea scale | 0.197 | 0.022 * | 0.225 | 0,004 * |
| Annual exacerbations | 0.2 | 0.018 * | 0.245 | 0.001 * |
| Hemoglobin | -0.331 | <0.001 * | -0.368 | <0.001 * |
| Lymphocyte count | -0.236 | <0.001 * | -0.143 | 0,034 * |
| NLR | 0.28 | <0.001 * | 0.178 | 0,008* |
| MLR | 0.239 | 0.005 * | 0.179 | 0,008* |
| PLR | 0.34 | <0.001 * | 0.087 | 0.2 |
| ADO score ** | 0.31 | <0.001 * | 0.323 | <0.001 * |
| DOSE score ** | 0.224 | 0.008 * | 0.312 | <0.001 * |
| BODEX score ** | 0.261 | 0.002 * | 0.337 | <0.001 * |

**Notes:** This table presents the Pearson correlation coefficients between RDW and various clinical, laboratory, and composite scoring parameters (e.g., ADO, DOSE, BODEx). The results are shown separately for the derivation (n=136) and validation (n=219) cohorts. * denotes a statistically significant correlation. ** The ADO, updated ADO, DOSE, and BODEX scores were calculated according to the methods recommended by their developers. Detailed information and calculation methods can be found in the original publications by the developers.

| **(a)**  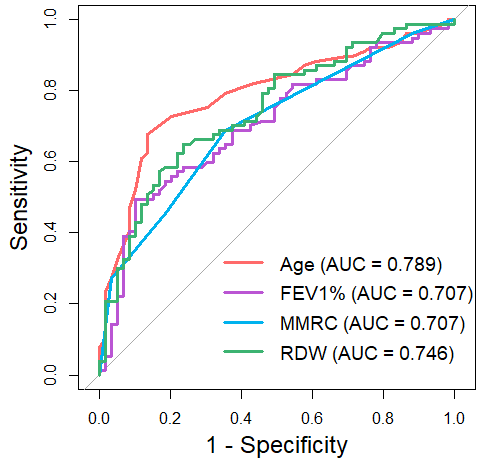 | **(b)**  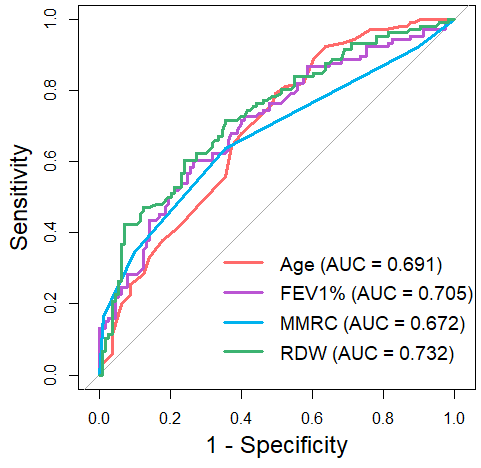 |
| --- | --- |

**Supplementary Figure S6. ROC Curves for Age, FEV1%, mMRC, and RDW in Predicting 10-Year Mortality** (A) In the derivation cohort, RDW demonstrated an AUC of 0.746, showing strong discriminatory capacity, outperforming FEV1% and mMRC, with Age achieving the highest AUC. (B) In the validation cohort, RDW maintained its robust predictive performance with an AUC of 0.732, surpassing FEV1%, mMRC, and Age.

*These findings underscore RDW's consistent and superior predictive capacity across both cohorts, solidifying its reliability as a biomarker for long-term mortality prediction.*
